1 **Bacterial profiles and their antimicrobial susceptibility pattern of**  
2 **Isolates from inanimate hospital environments at Tikur Anbessa**  
3 **Specialized Teaching Hospital, Addis Ababa, Ethiopia**

4  
5 **Shemse Sebre<sup>1, 2 \*</sup>, Woldaregay Erku<sup>1</sup>, Aminu Seman<sup>1, 2</sup>, Tewachw Awoke<sup>2, 3</sup>, Zelalem**  
6 **Desalegn<sup>1</sup>, Wude Mihret<sup>2</sup>, Adane Mihret<sup>1,2</sup>, Tamrat Abebe<sup>1</sup>**

7 1 Department of Microbiology, Immunology and Parasitology, School of Medicine, College of Health Sciences,  
8 Addis Ababa University, Addis Ababa, Ethiopia; 2 Armauer Hansen Research Institute; Addis Ababa, Ethiopia 3  
9 Department of Medical Laboratory Sciences, College of Health Sciences, Bahir Dar University, Bahir Dar, Ethiopia

10 \* Correspondence author email: [shemse.sebre@aau.edu.et](mailto:shemse.sebre@aau.edu.et)/[shemsesebre@gmail.com](mailto:shemsesebre@gmail.com)

11

12

13

14

15

16

17

18

19

20

21

22

23

24

25

26

## 27 **Abstract**

28 Microbial contamination of hospital environment plays an important role in the spread of health  
29 care-associated infections (HCAIs). This study was conducted to determine bacterial  
30 contamination, bacterial profiles and antimicrobial susceptibility pattern of bacterial isolates  
31 from environmental surfaces and medical equipment. A cross-sectional study was conducted at  
32 Tikur Anbessa Specialized Hospital (TASH) from June to September, 2018. A total of 164  
33 inanimate surfaces located at intensive care units (ICUs) and operation theaters (OTs) were  
34 swabbed. All isolates were identified by using routine bacterial culture, Gram staining and a  
35 panel of biochemical tests. For each identified bacteria, antibiogram profiles were determined by  
36 the Kirby Bauer disk diffusion method according to the guidelines of the Clinical and Laboratory  
37 Standards Institute (CLSI). Out of the 164 swabbed samples, 141 (86%) were positive for  
38 bacterial growth. The predominant bacteria identified from OTs and ICUs were *S. aureus* (23%  
39 vs 11.5%), *Acinetobacter* spp (3.8% vs 17.5%) and Coagulase negative *Staphylococcus* (CONS)  
40 (12.6% vs 2.7%) respectively. Linens were the most contaminated materials among items studied  
41 at the hospital (14.8%). The proportions of resistance among Gram-positive bacteria (GPB) were  
42 high for penicillin (92.8%), cefoxitin (83.5%) and erythromycin (54.1%). However, the most  
43 effective antibiotics were clindamycin with only 10.4% and 16.5% resistance rates, respectively.  
44 The antimicrobial susceptibility profiles of Gram-negative bacteria (GNB) revealed that the most  
45 effective antibiotics were amikacin, ciprofloxacin, and gentamicin with resistance rate of 25%,  
46 37.5%, and 46.3%, respectively. However, the highest resistance was recorded against ampicillin  
47 (97.5%), ceftazidime (91.3%), ceftriaxone (91.3%) and aztreonam (90%). The inanimate  
48 surfaces near immediate patient environment and commonly touched medical equipment within  
49 OTs and ICUs are reservoirs of potential pathogenic bacteria that could predispose critically ill  
50 patients to acquire HCAIs. The proportions of antimicrobial resistance profile of the isolates are  
51 much higher from studied clean inanimate environments.

52 **Keywords:** Antimicrobial susceptibility pattern, Operation theaters, Inanimate Hospital  
53 environments, Intensive care unit, Bacteria.

54

55

56

## 57 **Introduction**

58 Hospital environment represents a new ecological place for medically important nosocomial  
59 pathogens, antibiotic-resistant microorganisms and reservoirs of resistance gene, which have  
60 been commonly, found on various surfaces within hospitals (e.g. medical equipment,  
61 housekeeping surfaces, workplaces and lobby (furniture) [1, 2]. Studies investigating hospital  
62 environments reported that pathogens were ubiquitous in all hospital units but the interest was  
63 usually focused on intensive care and operation unit, especially due to the vulnerability of  
64 patients in these units [3]. There is also high antibiotic usage and invasive procedure from these  
65 units [1].

66 Bacterial cross-contamination plays an important role in health care-associated infections  
67 (HCAIs) and resistant strain dissemination [1, 4]. The majority of the HCAIs are believed to be  
68 transmitted directly from patient to patient, but increasing evidence demonstrates that also the  
69 medical personnel as well as the clinical environment (i.e., surfaces and equipment) often are a  
70 source of infections [5]. Hospital design and hygienic practices have been largely directed at  
71 controlling nosocomial pathogens and resistant strains contaminating air, hands, equipment, and  
72 surfaces [6]. A better understanding of how bacterial cross-contamination occurs can provide the  
73 basis for the development of evidence-based preventive measures [4].

74 Emergence of multi-drug resistant (MDR) strains in a hospital environment; particularly in  
75 developing countries, is an increasing problem which is an obstacle for management of HCAIs  
76 [7-10]. In Ethiopia, studies reported high prevalence of HCAIs mainly due to MDR pathogens  
77 including the country's largest tertiary referral Hospitals [11-13], which warrants the critical  
78 need for a reassessment of the role played by inanimate environment in the transmission of  
79 nosocomial infections [6, 14].

80 Studies on the bacterial contaminations of ward of the hospital environments in Ethiopia reported  
81 high bacterial load and multidrug resistant (MDR) strains [9, 10, 15, 16]. However, few data  
82 exist on the bacterial contamination of the hospital environment in the studied hospital.  
83 Therefore, the aim of this study were to determine bacterial contamination, detect potential

84 pathogenic bacteria and to determine the antimicrobial susceptibility patterns from inanimate  
85 hospital environments in the environments of Operation Theaters (OTs) and Intensive Care Units  
86 (ICUs) at Tikur Anbessa Specialized Teaching Hospital in Addis Ababa, Ethiopia.

## 87 **Materials and Methods**

### 88 **Study setting, Study period and Sampling locations**

89 A cross-sectional study was conducted at Tikur Anbessa Specialized Hospital (TASH), Addis  
90 Ababa, Ethiopia from June to September, 2018. TASH is a tertiary hospital and major referral  
91 center for other hospitals in Ethiopia. TASH has 800 beds and provides care for approximately  
92 370,000–400,000 patients per year. The samples were collected from four intensive care units  
93 including Surgical, Pediatric, Medical and Medical-Surgical units. A total of seven operating  
94 theaters were examined including Emergency, Neurology, Endo-Renal, Obstetrics and  
95 gynaecology, Pediatrics, Cardio-Vascular and Gastro intestinal tract (GIT) units.

### 96 **Surfaces sampling**

97 The detection of bacteria in ICUs and OTs were performed by using the swab method from  
98 surfaces and medical devices. All samples were collected every morning after cleaning of the  
99 hospital environment was completed. Moreover, samples in OTs were collected before start of  
100 operations. Sampling sites around a bed in each ICUs and OTs were chosen based on the  
101 frequency with which the surfaces were touched. Sterile swabs were moistened in Brain Heart  
102 Infusion (BHI) and then, were used to swab (i) commonly touched medical equipment including  
103 beds, monitors, OR-light, linens, ventilators, oxygen supply, anesthesia machine, suction buttons  
104 and Laparoscopy (ii) workstation, including keyboards, computer mice; (iii) environments  
105 including floors, wall and corridors; (iv) Lobby (furniture) including chair, table, lockers and  
106 trowels; (v) Sinks; (vi) hospital textiles including bed linen based on methods described  
107 previously [17-20].

### 108 **Microbiology Analysis**

109 Each swab sample was pre-enriched in sterile BHI and incubated at 37°C for 24 hours. A loop  
110 full of the turbid broth was then sub-cultured on blood agar (Oxoid, UK), Mannitol salt agar  
111 (MSA), MacConkey agar and Chromagar TM Strep B base plates (Chromagar microbiology,

112 France). Differential and selective characteristics for each agar medium were recorded for the  
113 initial screening of suspected potential pathogens. Furthermore, specific colony color (mauve  
114 color) on Chromagar TM Strep B was considered for Group B *Streptococci* (GBS) while yellow  
115 colony color on MSA was considered for *S. aureus*.

116 Gram-negative bacteria were further identified by Gram stain and standard biochemical tests like  
117 Triple Sugar Iron Agar (TSI), urea, citrate, Sulfide Indole Motility (SIM) medium, growth in  
118 Lysine Iron Agar (LIA), Mannitol, malonate, and oxidase test. On the other hand, Gram-positive  
119 bacteria were further identified by Gram stain, optochin, bacitracin, CAMP test and different  
120 biochemical tests such as catalase, coagulase, bile esculin and salt tolerance test described based  
121 on hand book of Clinical Microbiology Procedures [21].

### 122 **Antimicrobial susceptibility testing**

123 Antimicrobial susceptibility testing of the isolates were performed using 21 antibiotics (Oxoid,  
124 UK) based on the Kirby-Bauer disk diffusion method on Mueller-Hinton agar (MHA) (Oxoid,  
125 UK) and Mueller-Hinton with blood agar (Oxoid, UK) for *Streptococci* spp and *Enterococcus*  
126 spp [22]. An inoculum for each isolate was prepared by emulsifying colonies from an overnight  
127 pure culture in sterile normal saline (0.85%) in test tubes with the turbidity adjusted to 0.5  
128 McFarland standards. The bacterial suspension was uniformly streaked on MHA plates using  
129 sterile swabs and left for 3 minutes prior to introduction of the antibiotics.

130 For Gram-negative bacteria the following antibiotics were used (in µg/disk): ampicillin (10),  
131 amoxicillin and clavulanic acid (10/10), ceftriaxone (30), cefotaxime (30), ceftazidime (30),  
132 amikacin (30), gentamicin (10), ciprofloxacin (5), sulfamethoxazole-trimethoprim (1.25/23.75),  
133 cefoxitin (30), cefuroxime (30), cefepime (30), piperacillin-tazobactam (100/10), meropenem  
134 (10) and aztreonam (30) based on Clinical Laboratory Standards Institute (CLSI) [22].

135 On the other hand, for Gram-positive bacteria antibiotics (in µg/disk) selected for susceptibility  
136 testing included penicillin (10 units), gentamicin (10), erythromycin (15), ciprofloxacin (5),  
137 doxycycline (30), vancomycin (30), cefoxitin (30), sulfamethoxazole-trimethoprim (1.25/23.75),  
138 clindamycin (2) and chloramphenicol (30). The plates were incubated at 35 °C for 24 h, and the  
139 diameters of zone of inhibition were measured with Vernier caliper and results were reported as  
140 susceptible (S), intermediate (I), or resistant (R), according to CLSI guidelines [22].

141 **Quality Assurance**

142 To ensure the quality of the result from different assays, internal quality assurance systems was  
143 in place for all laboratory procedures and double checking of the result was done. All the  
144 methods to be used were validated as fit for the purpose before use in the study. Standard  
145 operating procedures (SOPs) were used for specific purpose for all laboratory procedures.  
146 Quality control strains of *Enterococcus faecalis* ATCC® 29212, *S. aureus* ATCC® 25923, *E. coli*  
147 ATCC® 2592, *K. pneumoniae* ATCC®1705 and *K. pneumoniae* ATCC®1706 were used to  
148 confirm the result of antibiotics, media and to assess the quality of the general laboratory  
149 procedure [22].

150 **Statistical analysis**

151 Data analysis was performed using Stata version 14 software program (Stata Corporation,  
152 Lakeway Drive , College Station, Texas), and descriptive statistics (percentages or frequency)  
153 was calculated. A difference was considered statistically significant for P-value  $\leq 0.05$ .

154 **Ethics approval**

155 The study protocol was approved by the Department of Microbiology, Immunology and  
156 Parasitology Research Ethics Review Committee (DRERC), College of Health Sciences, Addis  
157 Ababa University (Ref. no. DRERC/17/18/02-G). Prior to sample collection, written approval  
158 was obtained from administrative unit of Tikur Anbessa Specialized Hospital.

159

160

161

162

163

164

165

166

## Results

167

### Culture Results

168 During the four months study, a total of 164 environmental swabs were collected in the studied  
169 OTs (n=99) and ICUs (n=65) of the hospital. Of these swab samples, 141(86%) were positive  
170 for bacterial growth, from which a total of 183 bacterial isolates were identified. Multi-bacterial  
171 contamination was detected in 26.8% of the samples, mainly found on the surfaces of ventilators,  
172 bed and linens.

173

### Frequency of bacterial etiologies

174 Out of the 183 bacterial isolates, 103(56.3%) were Gram-positive bacteria (GPB) and the rest  
175 Gram-negative bacteria (GNB). Among the GPB *S. aureus* (34.4%), CONS (15.3%) and *Bacillus*  
176 spp (3.3%) were the dominant isolates. Among the GNB *Acinetobacter* spp (21.3%),  
177 *Pseudomonas* spp (7.7%) and *E. coli* (4.9%) were the dominant isolates. Overall, *S. aureus* was  
178 the most frequently isolated bacteria (34.4%) followed by *Acinetobacter* spp (21.3%) and CONS  
179 (15.3%) (Table 1).

Table 1: The frequency of isolated bacteria at TASH, 2018

| Isolates                        | N (%)            |
|---------------------------------|------------------|
| <b>Gram-negative</b>            | <b>80(43.7)</b>  |
| <i>Acinetobacter</i> spp        | 39(21.3)         |
| <i>Pseudomonas</i> spp          | 14(7.7)          |
| <i>E. coli</i>                  | 9(4.9)           |
| <i>Serratia</i> spp             | 4(2.2)           |
| <i>Klebsiella pneumoniae</i>    | 6(3.3)           |
| <i>Klebsiella oxytoca</i>       | 4(2.2)           |
| Others*                         | 4(2.2)           |
| <b>Gram-positive</b>            | <b>103(56.3)</b> |
| <i>S. aureus</i>                | 63(34.4)         |
| CONS                            | 28(15.3)         |
| <i>Bacillus</i> spp             | 6(3.3)           |
| <i>Streptococcus agalactiae</i> | 3(1.6)           |
| <i>Enterococcus</i> spp         | 3(1.6)           |

180 \*Others: (*Enterobacter* spp, *Shigella* spp, *Klebsiella rhinoscleromatis*)

183

### **Distribution of bacterial isolates between ICUs and OTs**

184

185

186

187

188

189

190

191

192

193

194

195

196

197

198

199

200

Most of the potential bacterial pathogens were isolated from Intensive care units (ICUs), 50.3% (92/183). Significant differences between Gram-positive and Gram-negative bacteria were observed between wards in OTs (39.9% vs 9.8%) and ICUs (16.4% vs 33.9%) respectively ( $p=0.000$ ). The ICUs were mainly contaminated with GNB, 67.4% (62/92), of which the predominant ones being *Acinetobacter* spp accounting for 34.8% (32/92) followed by *S. aureus* with 22.8 % (21/92) isolation rate. Most of the bacteria in ICUs were isolated from Medical-Surgical (16.4%, 30/183) ward. The major pathogens in this ICU were *S. aureus* from GPB and *Acinetobacter* spp from GNB, each with isolation rate of (33.3%, 10/16). The Operation Theaters (OTs) were mainly contaminated by GPB, 80.2% (73/91). The major pathogens in the theatre were *S. aureus*, 46.2% (42/91) and CONS, 25.3% (23/91). Endo-Renal theatre was mostly contaminated with *S. aureus* with rate as high as 31.3% (5/16) (Table 2).



Table 2: Distribution of potential pathogenic bacteria between ICUs and OTs at TASH, 2018

| Bacteria                 | ICUs (N= 92)    |                 |               |                        | OTs (N=91)      |                 |                  |                |                 |                |                |
|--------------------------|-----------------|-----------------|---------------|------------------------|-----------------|-----------------|------------------|----------------|-----------------|----------------|----------------|
|                          | Surgical n (%)  | Pediatric n (%) | Medical n (%) | Medical-Surgical n (%) | Emergency n (%) | Neurology n (%) | Endo-Renal n (%) | Gyn-obs n (%)  | Pediatric n (%) | Cardo-Vs n (%) | GIT n (%)      |
| <i>S. aureus</i>         | 4(25)           | 4(16.7)         | 3(13.6)       | 10(33.3)               | 8(66.7)         | 7(53.8)         | 5(31.3)          | 6(60)          | 4(33.3)         | 6(42.9)        | 6(42.9)        |
| CONS                     | 1(6.3)          | 0(0)            | 3(13.6)       | 1(3.3)                 | 4(33.3)         | 2(15.4)         | 0(0)             | 3(30)          | 6(50)           | 6(42.9)        | 2(14.3)        |
| <i>Bacillus spp</i>      | 0(0)            | 0(0)            | 0(0)          | 0(0)                   | 0(0)            | 2(15.4)         | 0(0)             | 1(10)          | 0(0)            | 0(0)           | 3(21.4)        |
| <i>Enterococcus spp</i>  | 0(0)            | 1(4.2)          | 1(4.5)        | 0(0)                   | 0(0)            | 0(0)            | 0(0)             | 0(0)           | 1(8.3)          | 0(0)           | 0(0)           |
| GBS                      | 0(0)            | 0(0)            | 0(0)          | 2(6.7)                 | 0(0)            | 1(7.7)          | 0(0)             | 0(0)           | 0(0)            | 0(0)           | 0(0)           |
| <i>Acinetobacter spp</i> | 6 (37.5)        | 6 (25)          | 10 (45.5)     | 10 (33.3)              | 0(0)            | 0(0)            | 4(25)            | 0(0)           | 1(8.3)          | 1(7.1)         | 1(7.1)         |
| <i>Pseudomonas spp</i>   | 2(12.5)         | 5(20.8)         | 2(9.1)        | 0(0)                   | 0(0)            | 1(7.7)          | 2(12.5)          | 0(0)           | 0(0)            | 0(0)           | 2(14.3)        |
| <i>Klebsiella spp</i>    | 1(6.3)          | 4(16.7)         | 2(9.1)        | 2(6.7)                 | 0(0)            | 0(0)            | 2(12.5)          | 0(0)           | 0(0)            | 0(0)           | 0(0)           |
| <i>E. coli</i>           | 1(6.3)          | 4(16.7)         | 1(14.5)       | 3(10)                  | 0(0)            | 0(0)            | 0(0)             | 0(0)           | 0(0)            | 0(0)           | 0(0)           |
| <i>Serratia spp</i>      | 1(6.3)          | 0(0)            | 0(0)          | 0(0)                   | 0(0)            | 0(0)            | 2(12.5)          | 0(0)           | 0(0)            | 1(7.1)         | 0(0)           |
| Others *                 | 0(0)            | 0(0)            | 0(0)          | 2(6.7)                 | 0(0)            | 0(0)            | 1(6.3)           | 0(0)           | 0(0)            | 0(0)           | 0(0)           |
| <b>Total, N (%)</b>      | <b>16 (8.7)</b> | <b>24(13.1)</b> | <b>22(12)</b> | <b>30(16.4)</b>        | <b>12(6.6)</b>  | <b>13(7.1)</b>  | <b>16(8.7)</b>   | <b>10(5.5)</b> | <b>12(6.6)</b>  | <b>14(7.7)</b> | <b>14(7.7)</b> |

202 Others \* (*Shigella spp*, *Enterobacter spp*); GIT: Gastro-intestinal tract unit, Cardo-Vs: Cardiovascular unit; Gyn-obs: Gynaecology obstetrics; GBS: Group B  
 203 Streptococcus (*Streptococcus agalactiae*), CONS: Coagulase negative staphylococci, OTs: Operation theaters; ICUs: Intensive care units

204

### **Distribution of bacterial pathogens over different surfaces**

205 The highest bacterial contaminated samples were taken from bed linens followed by  
206 environmental surfaces and bed. Linens were mostly contaminated with *Klebsiella* spp., (54.5%,  
207 6/27), followed by *Acinetobacter* spp., (15.4%, 6/39). Beds were mainly contaminated with  
208 *S. aureus* (12.7%, 8/63). Sinks were mainly colonized by *S. aureus* (7.7%, 6/63), *Pseudomonas*  
209 spp (7.1%, 1/14) and *Acinetobacter* spp (5.1%, 2/39). *Klebsiella* spp is mainly contaminated  
210 ventilators (27.3%, 3/11) (Table 3).

211

Table 3: Distribution of bacteria over different surfaces in ICU and OTs at TASH, Addis Ababa, Ethiopia, 2018

| Sampling points        | Bacteria, n (%)  |             |                     |                         |            |                          |                        |                       |                |                     |                     |
|------------------------|------------------|-------------|---------------------|-------------------------|------------|--------------------------|------------------------|-----------------------|----------------|---------------------|---------------------|
|                        | <i>S. aureus</i> | CONS        | <i>Bacillus spp</i> | <i>Enterococcus spp</i> | GBS        | <i>Acinetobacter spp</i> | <i>Pseudomonas spp</i> | <i>Klebsiella spp</i> | <i>E. coli</i> | <i>Serratia spp</i> | Others <sup>A</sup> |
| Anastasia machine      | 5(7.9)           | 2(7.1)      | 1(16.7)             | 0(0)                    | 0(0)       | 1(2.6)                   | 1(7.1)                 | 0(0)                  | 0(0)           | 0(0)                | 0(0)                |
| Bed                    | 8(12.7)          | 2(7.1)      | 0(0)                | 0(0)                    | 1(33.3)    | 8(20.5)                  | 1(7.1)                 | 1(9.1)                | 2(22.2)        | 0(0)                | 0(0)                |
| Environmental surface* | 6(9.5)           | 6(21.4)     | 3(50)               | 1(33.3)                 | 0(0)       | 3(7.7)                   | 1(7.1)                 | 1(9.1)                | 0(0)           | 1(25)               | 0(0)                |
| Monitor                | 5(7.9)           | 3(10.7)     | 0(0)                | 0(0)                    | 1(33.3)    | 4(10.3)                  | 1(7.1)                 | 0(0)                  | 1(11.1)        | 0(0)                | 1(33.3)             |
| Sink                   | 6(9.5)           | 0(0)        | 0(0)                | 0(0)                    | 0(0)       | 2(5.1)                   | 1(7.1)                 | 0(0)                  | 0(0)           | 0(0)                | 1(33.3)             |
| Suction Machine        | 7(11.1)          | 3(10.7)     | 0(0)                | 1(33.3)                 | 0(0)       | 5(12.8)                  | 3(21.4)                | 0(0)                  | 1(11.1)        | 0(0)                | 0(0)                |
| Linens                 | 5(7.9)           | 4(14.3)     | 0(0)                | 0(0)                    | 1(33.3)    | 6(15.4)                  | 3(21.4)                | 6(54.5)               | 2(22.2)        | 0(0)                | 0(0)                |
| Lobby (furniture)      | 5(7.9)           | 3(10.7)     | 0(0)                | 0(0)                    | 0(0)       | 5(12.8)                  | 0(0)                   | 0(0)                  | 1(11.1)        | 1(25)               | 0(0)                |
| Ventilator             | 1(1.6)           | 1(3.6)      | 0(0)                | 0(0)                    | 0(0)       | 3(7.7)                   | 1(7.1)                 | 3(27.3)               | 2(22.2)        | 0(0)                | 0(0)                |
| Work station           | 6(9.5)           | 1(3.6)      | 2(33.3)             | 0(0)                    | 0(0)       | 2(5.1)                   | 0(0)                   | 0(0)                  | 0(0)           | 2(50)               | 0(0)                |
| Others <sup>B</sup>    | 9(14.3)          | 3(10.7)     | 0(0)                | 1(33.3)                 | 0(0)       | 0(0)                     | 2(14.3)                | 0(0)                  | 0(0)           | 0(0)                | 1(33.3)             |
| <b>Total</b>           | <b>n=63</b>      | <b>n=28</b> | <b>n=6</b>          | <b>n=3</b>              | <b>n=3</b> | <b>n=39</b>              | <b>n=14</b>            | <b>n=11</b>           | <b>n=9</b>     | <b>n=4</b>          | <b>n=3</b>          |

Others <sup>A</sup> (*Shigella* spp, *Enterobacter* spp); Others <sup>B</sup> (Laparoscopy, OR-Light, oxygen cylinder, Trowels); \*Environmental surfaces (Door knob, Floor, Corroder and Wall), Group B Streptococcus (*Streptococcus agalactiae*), CONS: Coagulase negative staphylococci.

214  
215  
216  
217  
218  
219  
220  
  
221  
  
222  
  
223  
  
224  
  
225  
  
226  
  
227  
  
228  
  
229  
  
230  
  
231  
  
232  
  
233

### **Antibiogram profile for Gram-positive isolates**

The proportions of antimicrobial resistance among GPB were high for penicillin (92.8%), cefoxitin (83.5%) and erythromycin (54.1%). Low level of resistance was recorded for clindamycin (10.4%) and gentamicin (16.5%). Using cefoxitin disk as a surrogate marker, 54(85.7%) of *Staphylococcus aureus* isolates were defined as MRSA. High resistance level was also recorded to penicillin (93.7%). Vancomycin resistance was demonstrated by 12 (19%) *S. aureus*, 5 (17.9%) CONS and 1(33.3%) *Enterococcus* spp (Table 4).

Table 4: Antimicrobial susceptibility pattern of Gram-positive bacteria at TASH, 2018.

| Isolates                | Antimicrobial agents N (%) |          |          |          |          |          |          |          |          |          |          |
|-------------------------|----------------------------|----------|----------|----------|----------|----------|----------|----------|----------|----------|----------|
|                         | Ptn                        | GEN      | CIP      | CHL      | SXT      | VAN      | ERY      | DA       | DOX      | FOX      | PEN      |
| <b>CONS</b>             | R                          | 5(17.9)  | 10(32.1) | 6(21.4)  | 11(39.3) | 5(17.9)  | 16(57.1) | 1(3.6)   | 15(53.6) | 22(78.6) | 26(92.9) |
|                         | S                          | 23(82.1) | 18(64.3) | 22(78.6) | 17(60.7) | 23(82.1) | 12(42.9) | 27(96.4) | 13(46.4) | 6(21.4)  | 2(7.1)   |
| <i>Enterococcus spp</i> | R                          | NT       | 1(33.3)  | 1(33.3)  | NT       | 1(33.3)  | 2(67.7)  | 2(66.7)  | 1(33.3)  | NT       | 2(66.7)  |
|                         | S                          | NT       | 2(66.7)  | 2(67.7)  | NT       | 2(66.7)  | 1(33.3)  | 1(33.3)  | 2(66.7)  | NT       | 1(33.3)  |
| <b>GBS</b>              | R                          | NT       | NT       | 2(66.7)  | NT       | 2(66.7)  | 3(100)   | 0(0)     | 1(33.3)  | NT       | 3(100)   |
|                         | S                          | NT       | NT       | 1(33.3)  | NT       | 1(33.3)  | 0(0)     | 3(100)   | 2(66.7)  | NT       | 0(0)     |
| <i>S. aureus</i>        | R                          | 10(15.9) | 12(19)   | 15(23.8) | 30(47.6) | 12(19)   | 31(49.2) | 7(11.3)  | 24(39.1) | 54(85.7) | 59(93.7) |
|                         | S                          | 53(84.1) | 51(81)   | 48(76.2) | 33(52.4) | 51(81)   | 32(50.8) | 55(88.7) | 39(61.9) | 9(14.3)  | 4(6.3)   |
| <b>Total</b>            | R                          | 15(16.5) | 23(24.5) | 23(24)   | 41(45)   | 20(20.6) | 53(54.1) | 10(10.4) | 41(42.3) | 76(83.5) | 90(92.8) |
|                         | S                          | 76(83.5) | 71(75.5) | 73(76)   | 50(55)   | 77(79.4) | 45(45.9) | 86(89.6) | 56(57.7) | 15(16.5) | 7(7.2)   |

N: Number of tested strains; R: Resistant; S: Sensitive; Ptn: Pattern; FOX: Cefoxitin; GEN: Gentamicin; CIP: Ciprofloxacin; CHL: Chloramphenicol; SXT: Trimethoprim-Sulfamethoxazole; VAN: Vancomycin; ERY: Erythromycin; DA: Clindamycin; DOX: Doxycycline; PEN: Penicillin, NT: Not tested, GBS : Group B Streptococcus (*Streptococcus agalactiae*), CoNS: Coagulase negative staphylococci

235 **Antibiogram profile for Gram-negative isolates**

236 Most of the GNB exhibited significantly high resistance to most of the tested antibiotics; for  
237 example, ampicillin (97.5%), ceftazidime (91.3%), ceftriaxone (91.3%) and aztreonam (90%),  
238 cefotaxime (83.8%), amoxicillin and clavulanic acid (77.6%) and ceftiofur (76.3%). Similarly,  
239 significant resistance level was also recorded for cefepime (75%), sulfamethoxazole-  
240 trimethoprim (71.3%), piperacillin-tazobactam (68.7%) and meropenem (56.3%). Low level  
241 resistance was recorded for amikacin (25%), ciprofloxacin (37.5%) and gentamicin (46.3%).  
242 *Acinetobacter* spp showed the highest resistance level to almost all tested antibiotics including  
243 penicillin, cephalosporins, and carbapenems and monobactam groups of antibiotics including:  
244 ampicillin (100%), aztreonam (100%), ceftazidime (100%), amoxicillin and clavulanic acid  
245 (100%), ceftriaxone (97.4%) and cefotaxime (92.3%). Low resistance level by *Acinetobacter* spp  
246 was recorded to amikacin (25%) (Table 5).

247

248

249

250

251

252

253

254

255

256

257

Table 5: Antimicrobial susceptibility pattern of Gram-negative bacteria at TASH, 2018

| Isolates                 | Ptn | Antimicrobial agent's n (%) |          |          |          |          |          |          |          |          |          |         |          |          |          |
|--------------------------|-----|-----------------------------|----------|----------|----------|----------|----------|----------|----------|----------|----------|---------|----------|----------|----------|
|                          |     | AMP                         | AZM      | CTX      | CRO      | CTZ      | FOX      | FEP      | AMC      | TZP      | MRP      | AK      | GEN      | CIP      | SXT      |
| <i>Acinetobacter spp</i> | R   | 39(100)                     | 39(100)  | 36(92.3) | 38(97.4) | 39(100)  | 37(94.8) | 34(87.2) | 32(100)  | 34(87.2) | 29(74.4) | 14(25)  | 27(69.2) | 18(46.1) | 31(79.5) |
|                          | S   | 0(0)                        | 0(0)     | 3(7.7)   | 1(2.6)   | 0(0)     | 2(5.2)   | 5(12.8)  | 5(0)     | 5(12.8)  | 10(25.6) | 25(75)  | 12(30.8) | 21(53.9) | 8(20.5)  |
| <i>E. coli</i>           | R   | 9(100)                      | 6(66.7)  | 7(77.8)  | 7(77.8)  | 7(77.8)  | 4(44.4)  | 7(77.7)  | 5(55.4)  | 5(55.6)  | 3(33.3)  | 2(22.2) | 4(44.4)  | 4(44.4)  | 7(77.8)  |
|                          | S   | 0(0)                        | 3(33.3)  | 2(22.2)  | 2(22.2)  | 2(22.2)  | 5(55.6)  | 2(33.3)  | 4(44.6)  | 4(44.4)  | 6(66.7)  | 7(77.8) | 5(55.6)  | 5(55.6)  | 2(22.2)  |
| <i>Enterobacter spp</i>  | R   | 2(100)                      | 2(100)   | 2(100)   | 2(100)   | 2(100)   | 2(100)   | 2(100)   | 2(100)   | 2(100)   | 1(50)    | 0(0)    | 1(50)    | 2(100)   | 2(100)   |
|                          | S   | 0(0)                        | 0(0)     | 0(0)     | 0(0)     | 0(0)     | 0(0)     | 0(0)     | 0(0)     | 0(0)     | 1(50)    | 2(100)  | 1(50)    | 0(0)     | 0(0)     |
| <i>K. oxytoca</i>        | R   | 4(100)                      | 3(75)    | 3(75)    | 4(100)   | 3(75)    | 3(75)    | 3(75)    | 1(50)    | 2(50)    | 1(25)    | 1(25)   | 1(25)    | 2(50)    | 2(50)    |
|                          | S   | 0(0)                        | 1(25)    | 1(25)    | 0(0)     | 1(25)    | 1(25)    | 1(25)    | 1(50)    | 2(50)    | 3(75)    | 3(75)   | 3(75)    | 2(50)    | 2(50)    |
| <i>K. pneumoniae</i>     | R   | 5(83.3)                     | 4(66.7)  | 4(66.7)  | 6(100)   | 5(83.7)  | 3(50)    | 5(83.3)  | 6(100)   | 4(66.7)  | 4(66.7)  | 3(50)   | 2(33.3)  | 2(33.4)  | 5(83.3)  |
|                          | S   | 1(16.7)                     | 2(33.3)  | 2(33.3)  | 0(0)     | 1(16.3)  | 3(50)    | 1(16.7)  | 0(0)     | 2(33.3)  | 2(33.3)  | 3(50)   | 4(66.7)  | 4(66.6)  | 1(16.7)  |
| <i>K. rhino</i>          | R   | 1(100)                      | 1(100)   | 1(100)   | 1(100)   | 1(100)   | 0(0)     | 1(100)   | 1(100)   | 0(0)     | 0(0)     | 0(0)    | 0(0)     | 0(0)     | 0(0)     |
|                          | S   | 0(0)                        | 0(0)     | 0(0)     | 0(0)     | 0(0)     | 1(100)   | 0(0)     | 0(0)     | 1(100)   | 1(100)   | 1(100)  | 1(100)   | 1(100)   | 1(100)   |
| <i>Pseudomonas spp</i>   | R   | 13(92.9)                    | 13(92.9) | 12(85.7) | 12(85.7) | 11(78.6) | 11(78.5) | 5(35.7)  | 8(57.1)  | 5(35.7)  | 6(42.8)  | 0(0)    | 2(14.3)  | 2(14.3)  | 8(57.2)  |
|                          | S   | 1(7.1)                      | 1(7.1)   | 2(14.3)  | 2(14.3)  | 3(21.4)  | 3(21.5)  | 9(64.3)  | 6(42.9)  | 9(64.3)  | 8(57.2)  | 14(100) | 12(85.7) | 12(85.7) | 6(43.7)  |
| <i>Serratia spp</i>      | R   | 4(100)                      | 3(75)    | 1(25)    | 2(50)    | 4(100)   | 1(25)    | 3(75)    | 3(75)    | 2(50)    | 1(25)    | 0(0)    | 0(0)     | 0(0)     | 1(25)    |
|                          | S   | 0(0)                        | 1(25)    | 3(75)    | 2(50)    | 0(0)     | 3(75)    | 1(25)    | 1(25)    | 2(50)    | 3(75)    | 4(100)  | 4(100)   | 4(100)   | 3(75)    |
| <i>Shigella spp</i>      | R   | 1(100)                      | 1(100)   | 1(100)   | 1(100)   | 1(100)   | 0(0)     | 0(0)     | 1(100)   | 1(100)   | 0(0)     | 0(0)    | 0(0)     | 0(0)     | 1(100)   |
|                          | S   | 0(0)                        | 0(0)     | 0(0)     | 0(0)     | 0(0)     | 1(100)   | 1(100)   | 0(0)     | 0(0)     | 1(100)   | 1(100)  | 1(100)   | 1(100)   | 0(0)     |
| Total                    | R   | 78(97.5)                    | 72(90)   | 67(83.8) | 73(91.3) | 73(91.3) | 61(76.3) | 60(75)   | 59(77.6) | 55(68.7) | 45(56.3) | 20(25)  | 37(46.3) | 30(37.5) | 57(71.3) |
|                          | S   | 2(2.5)                      | 2(10)    | 13(16.2) | 7(8.7)   | 7(8.7)   | 19(23.7) | 20(25)   | 17(22.4) | 25(31.3) | 35(43.7) | 60(75)  | 43(53.7) | 50(62.5) | 23(28.7) |

N: Number of tested strains; R: resistant; S: Sensitive; %: percentage; Ptn: Pattern; AMP: ampicillin; AZT: Aztreonam; CTX : cefotaxime; CRO: ceftriaxone; CTZ: ceftazidime; FOX: Cefoxitin; FEP: Cefepime; AMC: Amoxicillin and clavulanic acid ; CHL: Chloramphenicol; MRP: Meropenem; AK: Amikacin; GEN: Gentamicin; CIP: ciprofloxacin; SXT: Sulfamethoxazole + trimethoprim

## 260 **Discussions**

261 In the present study, out of 164 fomites and medical devices samples from swabs of normally  
262 clean hospital environments, 141(86%) were positive for bacterial contamination. Our result  
263 agreed with other reports where bacterial contamination was found to be very high such as  
264 report from Zimbabwe (86.2%) [14] and from Morocco (96.3%) [23]. In contrast to our result,  
265 lower bacterial contaminations were observed from studies conducted elsewhere; Gaza Strip  
266 (24.7%) [24], Sudan (29.7%) [25], Uganda (44.2%) [26], Nigeria (39.4%) [27] and Bahir Dar,  
267 Northwest Ethiopia (39.6%) [16]. Differences in hand hygiene, ventilation system, sterilisation  
268 and disinfection techniques could account for these discrepancies [1, 28, 29].

269 Higher levels of bacterial contamination observed in our study could be attributed primarily to  
270 the use of ineffective disinfectants during surface cleaning, and inadequate uses of standard  
271 precautions such as hand hygiene and contact precautions, as well as migration of the organisms  
272 through air flow or other means particularly in places where the ventilation system has not been  
273 not in place or not working properly [20]. Infrequent cleaning of inanimate surfaces and medical  
274 equipments could also contribute to poor microbial quality of the hospital surfaces [14, 30, 31].  
275 This situation is prominently linked to hospitals which show unwillingness to put funds into  
276 contamination control such as the ventilation systems, those that lack information about the level  
277 of contamination and ineffectiveness of commonly used disinfectants in their hospital, and those  
278 with inappropriate waste controls.

279 The results of our study showed substantial contamination of hospital inanimate environments  
280 by varied groups of bacteria, including both Gram-positive (56.3%) and Gram-negative (43.7%).  
281 Comparable to our results, frequency of GPB from other studies in Ethiopia and abroad proved  
282 to be constituted the leading contaminating bacteria compared to GNB; for example, in Gondar,  
283 Ethiopia (60.5% vs 39.5%) [32], in Northwest, Ethiopia (81.6% vs 18.4%) [16], in Iran (60.7%  
284 vs 39.3%) [33] and in Nigeria (52.2% vs 47.8%) [34]. The dominance of GPB could be  
285 explained by the fact that these bacteria, being devoid of lipid-dominant desiccation prone outer  
286 membrane, have natural ability to retain their viability on abiotic hospital environments for  
287 several days to months [29, 33].

288



289 However, in contrast to our results, several authors from different countries reported that GNB  
290 were isolated more frequently than Gram-positive ones: for example, Zimbabwe (66.2% vs  
291 33.82%) [14], Gaza Strip (51.6% vs 48.4%) [24] and Morocco (73.3% vs 26.7%) [23]. These  
292 variations may be due to different sampling times (e.g. during endemic vs outbreak situations),  
293 the presence of already colonized and/or infected patients during sampling, the use of different  
294 sampling techniques and culture methodologies, and variation in specific hospital sampling sites  
295 (e.g., OTs vs ICUs) [35-38]. In fact, in agreement to the latter reasoning, more GNB (67.4%;  
296 62/92) than Gram-positive ones were obtained from ICUs inanimate environment even our  
297 finding.

298 Overall, *S. aureus* was the most frequently isolated bacteria (39.8%) followed by  
299 *Acinetobacter* spp (18.9%) and CONS (15.5%). *S. aureus* and CONS were also the most  
300 frequently isolated bacteria from previous other studies such as Ethiopia [39], Nigeria [34] and  
301 Zaria, Nigeria [27]. *S. aureus* constitute part of the normal human flora, inhabiting the skin,  
302 mucous membranes [40] and regularly shed onto the hospital environment by patients and  
303 medical personnel, whereupon they persist [14]. This isolates were also considered as the  
304 potential pathogenic bacteria that result in nosocomial infections and indicators of inadequate  
305 clinical surface hygiene in hospital environments [17, 25, 41]. Moreover, these bacteria were  
306 also resistant to common disinfectant methods and hence spread easily in the environment, which  
307 enables them to colonize and infect the patients receiving health care service at the facility [24,  
308 33].

309 Among the different hospital environments and hospital items examined, the highest bacterial  
310 contaminated samples were taken from bed linens, environmental surface and beds, similar to the  
311 observations from other studies in Ethiopia and abroad [3, 27, 33, 36]. Bed linens and bed were  
312 mainly contaminated by *Acinetobacter* spp (20.5% and 15.4%), CONS (7.1% and 14.3%), and *S.*  
313 *aureus* (12.7% and 7.9%), respectively. Comparable results were obtained on beds and linens  
314 samples from studies conducted in Iran [33] and Nigeria [27]. The sources of such  
315 contaminations could be cross-contamination from a patient's flora, health care workers' hands,  
316 contaminated storage carts, or due to contamination during the washing process especially that of  
317 bed linens [33, 35, 37].

318 In our study, sinks were mainly colonized by *S. aureus* (7.7%, 6/63), *Pseudomonas* spp (7.1%,  
319 1/14) and *Acinetobacter* spp (5.1%, 2/39), which is in line with several reports that hospital  
320 associated outbreaks in critical care wards occur largely due to the opportunistic pathogen [14,  
321 27, 42]. This could be linked to the fact that the moist hospital environments, particularly sinks,  
322 are conducive for persistence of these bacteria, which are known to have the ability to form  
323 biofilms in water, sinks, toilets, showers and drains [43, 44]. Moreover, acquisition of multiple  
324 virulence determinants and intrinsic resistance to commonly used antibiotics and disinfectants by  
325 these pathogens may result in maintaining their viability and hence persistence under such harsh  
326 environments [43, 45].

327 Bloodstream infection and ventilator-associated pneumonia especially in the intensive care  
328 units are usually linked to device contamination such as central venous catheters, urinary  
329 catheters and ventilators [46]. In our study, ventilators were frequently contaminated by  
330 *Klebsiella* spp (27.3%, 3/11), which was also reported from a study conducted in Iran (54.4%,  
331 6/11) [33]. Source of contamination of ventilators by *K. pneumoniae* might be from the  
332 aspiration of secretions from the oropharynx of colonized patients, where staff hands may act as  
333 the transmission vehicle [47, 48].

334 In regards to antimicrobial resistance profile of the isolates, our results showed high  
335 proportions of drug resistance, where most of the GNB were highly resistant to most of the tested  
336 antibiotics such as ampicillin (97.5%), ceftazidime (91.3%), ceftriaxone (91.3%), aztreonam  
337 (90%), cefotaxime (83.8%), cefoxitin (76.3%), and amoxicillin and clavulanic acid (77.6%),  
338 which is in line with similar resistance rates from other studies conducted elsewhere like Gaza  
339 in Palestine [24], Morocco [3] and Sudan [25]. Increased resistance to  $\beta$ -lactams antibiotics is  
340 due to the selective pressure exerted by the antibiotics [49]. Because these tested antimicrobials  
341 represent the antibiotics most frequently used in practice, serious problems can be encountered  
342 while prescribing those antibiotics [3]. One way of fighting such a rise of resistance should  
343 include establishing guidelines for prescribing antibiotics [16] based on locally generated  
344 antimicrobial resistance data such as the findings from this study.

345 On the other hand, low resistance level was recorded to non-beta-lactam antimicrobials such as,  
346 amikacin (25%) and ciprofloxacin (37.5%). Comparable results were recorded from studies  
347 conducted from Sudan for amikacin (23.5%) and ciprofloxacin (42.7%) [25]. Still lower

348 resistance rate was documented for these two antibiotics in Palestine for amikacin (6.1%) and  
349 ciprofloxacin (27.3%) [24], possibly an area where they may not routinely be prescribed for  
350 community and/or hospital acquired infections.

351 Not surprisingly, GPB demonstrated elevated resistance to penicillin (92.8%), cefoxitin  
352 (83.5%) and erythromycin (54.1%). Similarly, high resistance level was also reported from  
353 Ethiopia by a Meta- analysis study for penicillin and erythromycin with a pooled resistance level  
354 of 99.1% and 97.2%, respectively [50]. Moreover, similar resistance level was also reported from  
355 Uganda for penicillin (93%) [26]. Of the 64 *S. aureus* isolates obtained in this study, 54 (85.7%)  
356 were MRSA, which is close to the rate reported from Zimbabwe (100%) [14], although much  
357 higher than the rate from Uganda (52%) [51].

358 In this study, vancomycin resistance was demonstrated by 12 (19%) *S. aureus* (VRSA),  
359 5(17.9%) CONS and 1(33.3%) *Enterococcus* spp. Vancomycin resistant *Staphylococci* were also  
360 reported in a study from Zimbabwe, where 40% of *S. aureus* and 23.5% of CONS were  
361 vancomycin resistant, despite its scarcity in usage [14]. It has been suggested that patients at risk  
362 for VRSA are co-infected or co-colonized with VRE and MRSA, which enables conjugative  
363 transfer of vanA gene from VRE to MRSA in a biofilm environment leading to a VRSA strain  
364 [33, 52].

## 365 **Conclusions**

366 In this study, bacterial samples were sought for and isolated only from the environmental  
367 surfaces; not from patients and hands of health professionals. *S. aureus*, *Acinetobacter* spp and  
368 CONS form the majority of the environmental contaminants most likely to cause HAIs. We  
369 concluded that special attention to infection control policies, antimicrobial resistance screening,  
370 good clinical practice and cleaning techniques are needed to reduce the potential risk of  
371 pathogenic bacteria and resistant strain transmission among hospital staff and patients. Our  
372 results may be indicative evidence that bacterial environmental contamination is possibly  
373 contributing to HAIs and MDR strain dissemination in the hospital environment and further large  
374 scale investigations are needed.

375

376 **Additional files**

377 **S 1 Table:** Morphological and biochemical characterization of gram-positive bacteria isolated from  
378 environmental samples at Tikur Anbessa Specialized Hospital, Ethiopia, 2018 (DOC 35 kb).

379 **S 2 Table:** Morphological and biochemical characterization of gram-negative bacteria isolated from  
380 environmental samples at Tikur Anbessa Specialized Hospital, Ethiopia, 2018 (DOC 35 kb).

381 **S 3 Table:** Data description (DOC 17 kb).

382 **Funding**

383 This research work were financed by Addis Ababa University and Armauer Hansen research  
384 institute, Addis Ababa, Ethiopia. The funder had no role in study design, data collection and  
385 analysis, decision to publish, or preparation of the manuscript.

386 **Acknowledgements**

387 The authors here by thank Addis Ababa University (AAU) and Armauer Hansen Research  
388 Institute (AHRI) for their financial and material support and Tikur Anbessa Specialized Hospital  
389 staff.

390 **Competing interests**

391 The authors declare that they have no competing interests.

392 **Data Availability**

393 The dataset supporting the findings of this article have been attached as supplementary  
394 information files.

395

396

397

398

399

## 400 Reference

- 401 1. Mora M, Mahnert A, Koskinen K, Pausan MR, Oberauner-Wappis L, Krause R, et al.  
402 Microorganisms in confined habitats: microbial monitoring and control of intensive care units,  
403 operating rooms, cleanrooms and the International Space Station. *Frontiers in microbiology*.  
404 2016;7:1573.
- 405 2. Rozman U, Šostar Turk S. PCR Technique for the Microbial Analysis of Inanimate  
406 Hospital Environment. 2016. doi: 10.5772/65742.
- 407 3. Bakkali M, Hmid K, Kari K, Zouhdi M, Mzibri M. Characterization of Bacterial Strains  
408 and their Resistance Status in Hospital Environment. *J Trop Dis*. 2015;4(180):2.
- 409 4. Loftus RW, Brown JR, Koff MD, Reddy S, Heard SO, Patel HM, et al. Multiple  
410 reservoirs contribute to intraoperative bacterial transmission. *Anesthesia & Analgesia*.  
411 2012;114(6):1236-48.
- 412 5. Morales L, Rodriguez C, Gamboa-Coronado MDM. Molecular detection of *Clostridium*  
413 *difficile* on inert surfaces from a Costa Rican hospital during and after an outbreak. *Am J Infect*  
414 *Control*. 2016;44(12):1517-9. doi: 10.1016/j.ajic.2016.09.003. PubMed PMID: 28340959.
- 415 6. Otter JA, Yezli S, French GL. The role played by contaminated surfaces in the  
416 transmission of nosocomial pathogens. *Infect Control Hosp Epidemiol*. 2011;32(7):687-99. doi:  
417 10.1086/660363. PubMed PMID: 21666400.
- 418 7. Gebremariam TT, Declaro MFF. Operating theaters as a source of nosocomial infection:  
419 a systematic review. *Saudi Journal for Health Sciences*. 2014;3(1):5.
- 420 8. Tesfaye T, Berhe Y, Gebreselassie K. Microbial contamination of operating Theatre at  
421 Ayder Referral Hospital, Northern Ethiopia. *International Journal of Pharma Sciences and*  
422 *Research (IJPSR)*. 2015;6(10).
- 423 9. Solomon FB, Wadilo FW, Arota AA, Abraham YL. Antibiotic resistant airborne bacteria  
424 and their multidrug resistance pattern at University teaching referral Hospital in South Ethiopia.  
425 *Annals of clinical microbiology and antimicrobials*. 2017;16(1):29.
- 426 10. Engda T, Moges F, Gelaw A, Eshete S, Mekonnen F. Prevalence and antimicrobial  
427 susceptibility patterns of extended spectrum beta-lactamase producing *Enterobacteriaceae* in the  
428 University of Gondar Referral Hospital environments, northwest Ethiopia. *BMC Res Notes*.  
429 2018;11(1):335. doi: 10.1186/s13104-018-3443-1. PubMed PMID: 29788988; PubMed Central  
430 PMCID: PMC5964971.
- 431 11. Endalafer N, Gebre-Selassie S, Kotiso B. Nosocomial bacterial infections in a tertiary  
432 hospital in Ethiopia. *Journal of Infection Prevention*. 2011;12(1):38-43.
- 433 12. Desta K, Woldeamanuel Y, Azazh A, Mohammad H, Desalegn D, Shimelis D, et al.  
434 High Gastrointestinal Colonization Rate with Extended-Spectrum  $\beta$ -Lactamase-Producing  
435 *Enterobacteriaceae* in Hospitalized Patients: Emergence of Carbapenemase-Producing *K.*  
436 *pneumoniae* in Ethiopia. *PloS one*. 2016;11(8):e0161685.
- 437 13. Yallew WW, Kumie A, Yehuala FM. Point prevalence of hospital-acquired infections in  
438 two teaching hospitals of Amhara region in Ethiopia. *Drug, healthcare and patient safety*.  
439 2016;8:71.
- 440 14. Mbanga J, Sibanda A, Rubayah S, Buwerimwe F, Mambodza K. Multi-Drug Resistant  
441 (MDR) Bacterial Isolates on Close Contact Surfaces and Health Care Workers in Intensive Care  
442 Units of a Tertiary Hospital in Bulawayo, Zimbabwe. *Journal of Advances in Medicine and*  
443 *Medical Research*. 2018:1-15.

- 444 15. Shiferaw T, Gebr-Silasse L, Mulisa G. Bacterial indoor-air load and its implications for  
445 healthcare-acquired infections in a teaching hospital in Ethiopia. *International Journal of*  
446 *Infection Control*. 2016;12(1).
- 447 16. Getachew H, Derby A, Mekonnen D. Surfaces and air bacteriology of selected wards at a  
448 referral hospital, Northwest Ethiopia: a cross-sectional study. *International journal of*  
449 *microbiology*. 2018;2018.
- 450 17. Dancer SJ. How do we assess hospital cleaning? A proposal for microbiological  
451 standards for surface hygiene in hospitals. *Journal of Hospital Infection*. 2004;56(1):10-5.
- 452 18. Messai Y, Iabadene H, Benhassine T, Alouache S, Tazir M, Gautier V, et al. Prevalence  
453 and characterization of extended-spectrum  $\beta$ -lactamases in *Klebsiella pneumoniae* in Algiers  
454 hospitals (Algeria). *Pathologie Biologie*. 2008;56(5):319-25.
- 455 19. Chen C-H, Lin Y-L, Chen K-H, Chen W-P, Chen Z-F, Kuo H-Y, et al. Bacterial diversity  
456 among four healthcare-associated institutes in Taiwan. *Scientific reports*. 2017;7(1):8230.
- 457 20. Dallolio L, Raggi A, Sanna T, Mazzetti M, Orsi A, Zanni A, et al. Surveillance of  
458 environmental and procedural measures of infection control in the operating theatre setting.  
459 *International journal of environmental research and public health*. 2018;15(1):46.
- 460 21. Garcia LS. *Clinical microbiology procedures handbook*: American Society for  
461 *Microbiology Press*; 2010.
- 462 22. CLSI. *Performance standards for antimicrobial susceptibility testing*. 28th ed. Wayne P,  
463 editor: *Clinical and Laboratory Standards Institute*; 2018.
- 464 23. Lalami AEO, Touijer H, El-Akhal F, Ettayebi M, Benchemsi N, Maniar S, et al.  
465 *Microbiological monitoring of environment surfaces in a hospital in Fez city, Morocco*  
466 *Surveillance microbiologique des surfaces de l'environnement d'un hôpital dans la ville de Fès,*  
467 *au Maroc*. 2016.
- 468 24. Al Laham NA. Prevalence of bacterial contamination in general operating theaters in  
469 selected hospitals in the Gaza Strip, Palestine. *Journal of infection and public health*.  
470 2012;5(1):43-51.
- 471 25. Nurain AM, Bilal NE, Ibrahim ME. The frequency and antimicrobial resistance patterns  
472 of nosocomial pathogens recovered from cancer patients and hospital environments. *Asian*  
473 *Pacific Journal of Tropical Biomedicine*. 2015;5(12):1055-9.
- 474 26. Sserwadda I, Lukenge M, Mwambi B, Mboowa G, Walusimbi A, Segujja F. Microbial  
475 contaminants isolated from items and work surfaces in the post-operative ward at Kawolo  
476 general hospital, Uganda. *BMC infectious diseases*. 2018;18(1):68.
- 477 27. Hammuel C, Jatau ED, Whong CM. Prevalence and antibiogram pattern of some  
478 nosocomial pathogens isolated from Hospital Environment in Zaria, Nigeria. *Aceh International*  
479 *Journal of Science and Technology*. 2014;3(3):131-9.
- 480 28. Weber DJ, Anderson D, Rutala WA. The role of the surface environment in healthcare-  
481 associated infections. *Curr Opin Infect Dis*. 2013;26(4):338-44. doi:  
482 10.1097/QCO.0b013e3283630f04. PubMed PMID: 23743816.
- 483 29. Chemaly RF, Simmons S, Dale Jr C, Ghantaji SS, Rodriguez M, Gubb J, et al. The role  
484 of the healthcare environment in the spread of multidrug-resistant organisms: update on current  
485 best practices for containment. *Therapeutic advances in infectious disease*. 2014;2(3-4):79-90.
- 486 30. Weber DJ, Rutala WA. Understanding and preventing transmission of healthcare-  
487 associated pathogens due to the contaminated hospital environment. *Infect Control Hosp*  
488 *Epidemiol*. 2013;34(5):449-52. doi: 10.1086/670223. PubMed PMID: 23571359.

- 489 31. Santajit S, Indrawattana N. Mechanisms of Antimicrobial Resistance in ESKAPE  
490 Pathogens. *Biomed Res Int*. 2016;2016:2475067. doi: 10.1155/2016/2475067. PubMed PMID:  
491 27274985; PubMed Central PMCID: PMC4871955.
- 492 32. Alemu A, Misganaw D, Wondimeneh Y. Bacterial profile and their antimicrobial  
493 susceptibility patterns of computer keyboards and mice at Gondar University Hospital,  
494 Northwest Ethiopia. *Biomed Biotechnol*. 2015;3(1):1-7.
- 495 33. Tajeddin E, Rashidan M, Razaghi M, Javadi SS, Sherafat SJ, Alebouyeh M, et al. The  
496 role of the intensive care unit environment and health-care workers in the transmission of  
497 bacteria associated with hospital acquired infections. *J Infect Public Health*. 2016;9(1):13-23.  
498 doi: 10.1016/j.jiph.2015.05.010. PubMed PMID: 26117707.
- 499 34. Maryam A, Hadiza U-S, Aminu UM. Characterization and determination of antibiotic  
500 susceptibility pattern of bacteria isolated from some fomites in a teaching hospital in northern  
501 Nigeria. *African Journal of Microbiology Research*. 2014;8(8):814-8.
- 502 35. Rohr U, Kaminski A, Wilhelm M, Jurzik L, Gatermann S, Muhr G. Colonization of  
503 patients and contamination of the patients' environment by MRSA under conditions of single-  
504 room isolation. *Int J Hyg Environ Health*. 2009;212(2):209-15. Epub 2008/08/01. doi:  
505 10.1016/j.ijheh.2008.05.003. PubMed PMID: 18667356.
- 506 36. Ekrami A, Kayedani A, Jahangir M, Kalantar E, Jalali M. Isolation of common aerobic  
507 bacterial pathogens from the environment of seven hospitals, Ahvaz, Iran. 2011.
- 508 37. Faires MC, Pearl DL, Berke O, Reid-Smith RJ, Weese JS. The identification and  
509 epidemiology of methicillin-resistant *Staphylococcus aureus* and *Clostridium difficile* in patient  
510 rooms and the ward environment. *BMC Infect Dis*. 2013;13(1):342. doi: 10.1186/1471-2334-13-  
511 342. PubMed PMID: 23883171; PubMed Central PMCID: PMC3727943.
- 512 38. Faires MC, Pearl DL, Ciccotelli WA, Straus K, Zinken G, Berke O, et al. A prospective  
513 study to examine the epidemiology of methicillin-resistant *Staphylococcus aureus* and  
514 *Clostridium difficile* contamination in the general environment of three community hospitals in  
515 southern Ontario, Canada. *BMC Infect Dis*. 2012;12(1):290. doi: 10.1186/1471-2334-12-290.  
516 PubMed PMID: 23136936; PubMed Central PMCID: PMC3532087.
- 517 39. Mengistu H, Misganaw B, Elshaday A. Bacterial load and antibiotic susceptibility pattern  
518 of isolates in operating rooms at Hawassa University Referral Hospital, southern Ethiopia.  
519 *Journal of Microbiology and Antimicrobials*. 2016;8(1):1-6. doi: 10.5897/jma2015.0349.
- 520 40. Tong SY, Davis JS, Eichenberger E, Holland TL, Fowler VG. *Staphylococcus aureus*  
521 infections: epidemiology, pathophysiology, clinical manifestations, and management. *Clinical*  
522 *microbiology reviews*. 2015;28(3):603-61.
- 523 41. Fagade OE, Ezeamagu CO, Oyelade AA, Ogunjobi AA. Comparative study of antibiotic  
524 resistance of *Staphylococcus* species isolated from clinical and environmental samples.  
525 *Assumption University J Tech*. 2010;13(3):165-9.
- 526 42. Salm F, Deja M, Gastmeier P, Kola A, Hansen S, Behnke M, et al. Prolonged outbreak of  
527 clonal MDR *Pseudomonas aeruginosa* on an intensive care unit: contaminated sinks and  
528 contamination of ultra-filtrate bags as possible route of transmission? *Antimicrobial Resistance*  
529 *& Infection Control*. 2016;5(1):53.
- 530 43. Parcell BJ, Oravcova K, Pinheiro M, Holden MTG, Phillips G, Turton JF, et al.  
531 *Pseudomonas aeruginosa* intensive care unit outbreak: winnowing of transmissions with  
532 molecular and genomic typing. *J Hosp Infect*. 2018;98(3):282-8. doi: 10.1016/j.jhin.2017.12.005.  
533 PubMed PMID: 29229490; PubMed Central PMCID: PMC5840502.

- 534 44. Kramer A, Schwebke I, Kampf G. How long do nosocomial pathogens persist on  
535 inanimate surfaces? A systematic review. *BMC infectious diseases*. 2006;6(1):130.
- 536 45. Ensayef S, Al Shalchi S, Sabbar M. Microbial contamination in the operating theatre: a  
537 study in a hospital in Baghdad. 2009.
- 538 46. Sui Y-S, Wan G-H, Chen Y-W, Ku H-L, Li L-P, Liu C-H, et al. Effectiveness of bacterial  
539 disinfectants on surfaces of mechanical ventilator systems. *Respiratory care*. 2012;57(2):250-6.
- 540 47. Hu L, Liu Y, Deng L, Zhong Q, Hang Y, Wang Z, et al. Outbreak by ventilator-  
541 associated ST11 *K. pneumoniae* with co-production of CTX-M-24 and KPC-2 in a SICU of a  
542 tertiary teaching hospital in central China. *Frontiers in microbiology*. 2016;7:1190.
- 543 48. Martin RM, Bachman MA. Colonization, infection, and the accessory genome of  
544 *Klebsiella pneumoniae*. *Frontiers in cellular and infection microbiology*. 2018;8:4.
- 545 49. Davies J, Davies D. Origins and evolution of antibiotic resistance. *Microbiol Mol Biol*  
546 *Rev*. 2010;74(3):417-33. doi: 10.1128/MMBR.00016-10. PubMed PMID: 20805405; PubMed  
547 Central PMCID: PMCPMC2937522.
- 548 50. Eshetie S, Tarekegn F, Moges F, Amsalu A, Birhan W, Huruy K. Methicillin resistant  
549 *Staphylococcus aureus* in Ethiopia: a meta-analysis. *BMC Infect Dis*. 2016;16(1):689. doi:  
550 10.1186/s12879-016-2014-0. PubMed PMID: 27871245; PubMed Central PMCID:  
551 PMCPMC5117566.
- 552 51. Sievert DM, Ricks P, Edwards JR, Schneider A, Patel J, Srinivasan A, et al.  
553 Antimicrobial-resistant pathogens associated with healthcare-associated infections summary of  
554 data reported to the National Healthcare Safety Network at the Centers for Disease Control and  
555 Prevention, 2009–2010. *Infection Control & Hospital Epidemiology*. 2013;34(1):1-14.
- 556 52. Loomba PS, Taneja J, Mishra B. Methicillin and vancomycin resistant *S. aureus* in  
557 hospitalized patients. *Journal of global infectious diseases*. 2010;2(3):275.

559

560
